# Supplementary material
Source: PubMed Central journal article supplement (PMC4216197)
Supplement: jp5025119_si_001.pdf [file jp5025119_si_001.pdf]

Small Molecule Crystallography Lab  
Department of Chemistry and Biochemistry  
University of Oklahoma  
101 Stephenson Parkway  
Norman, OK 73019-5251

Sample: Calcium Picolinate (D<sub>2</sub>O)      Lab ID: 12136m  
User: Kieth Thomas  
Formula: C<sub>7</sub> H<sub>3</sub> Ca D<sub>6</sub> N O<sub>7</sub>  
Date: January 29, 2014

For Prof. Charles Rice

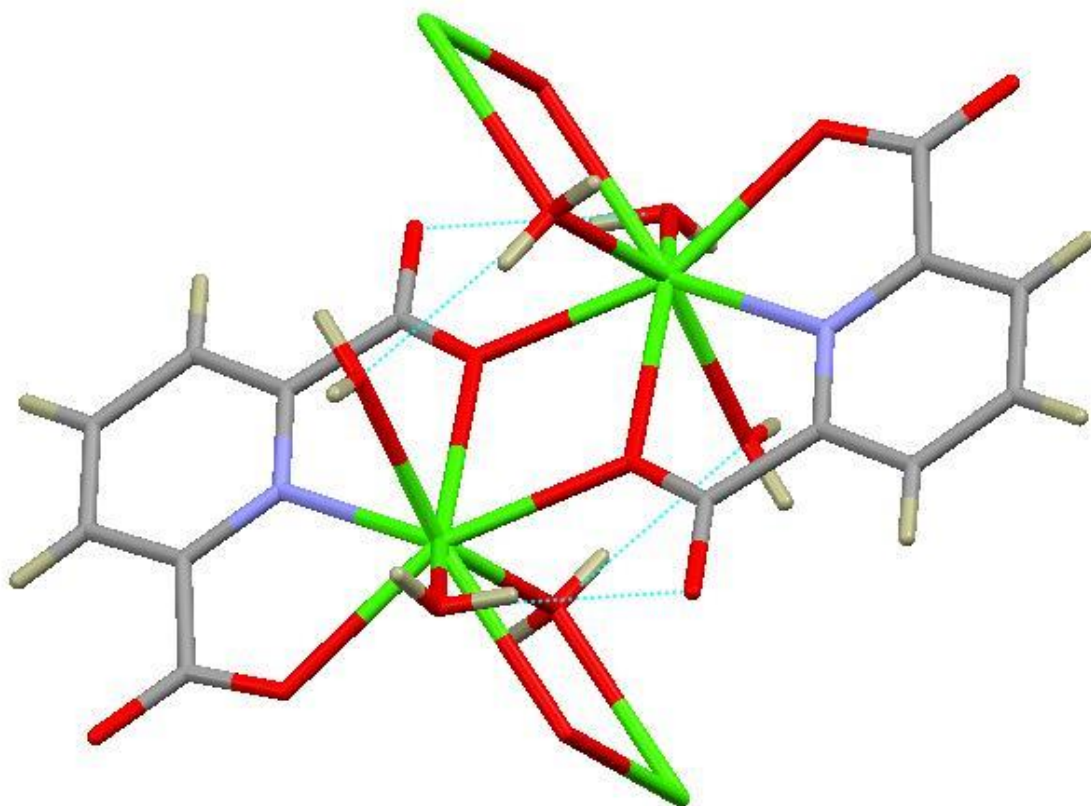

## Table of Contents

|                                                     |    |
|-----------------------------------------------------|----|
| Figure 1. Thermal Ellipsoid Plot of Structure ..... | 3  |
| Figure 2. Packing Diagram .....                     | 4  |
| Comments .....                                      | 5  |
| Experimental .....                                  | 5  |
| Acknowledgements .....                              | 6  |
| References .....                                    | 6  |
| Table 1. Crystal Data .....                         | 7  |
| Table 2. Atom Coordinates .....                     | 8  |
| Table 3. Bond Distances and Angles .....            | 9  |
| Table 4. Anisotropic Displacement Parameters .....  | 11 |
| Table 5. Hydrogen Atom Parameters .....             | 12 |
| Table 6. Torsion Angles .....                       | 13 |
| Table 7. Hydrogen Bond Details .....                | 14 |

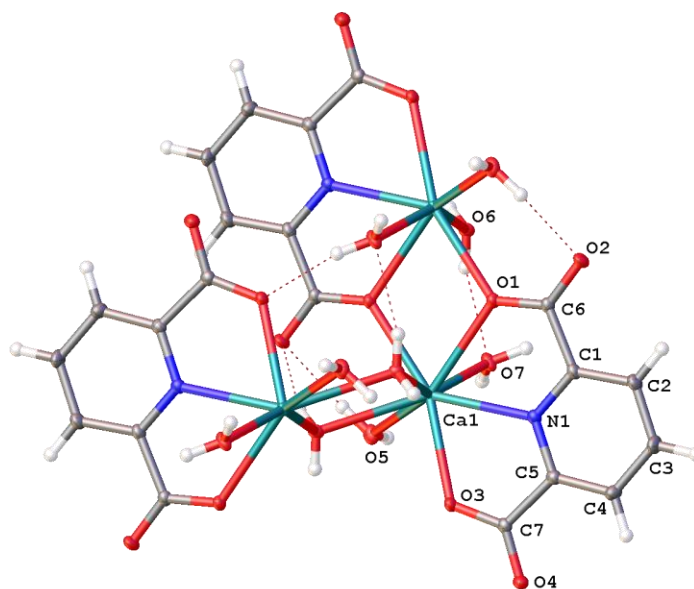

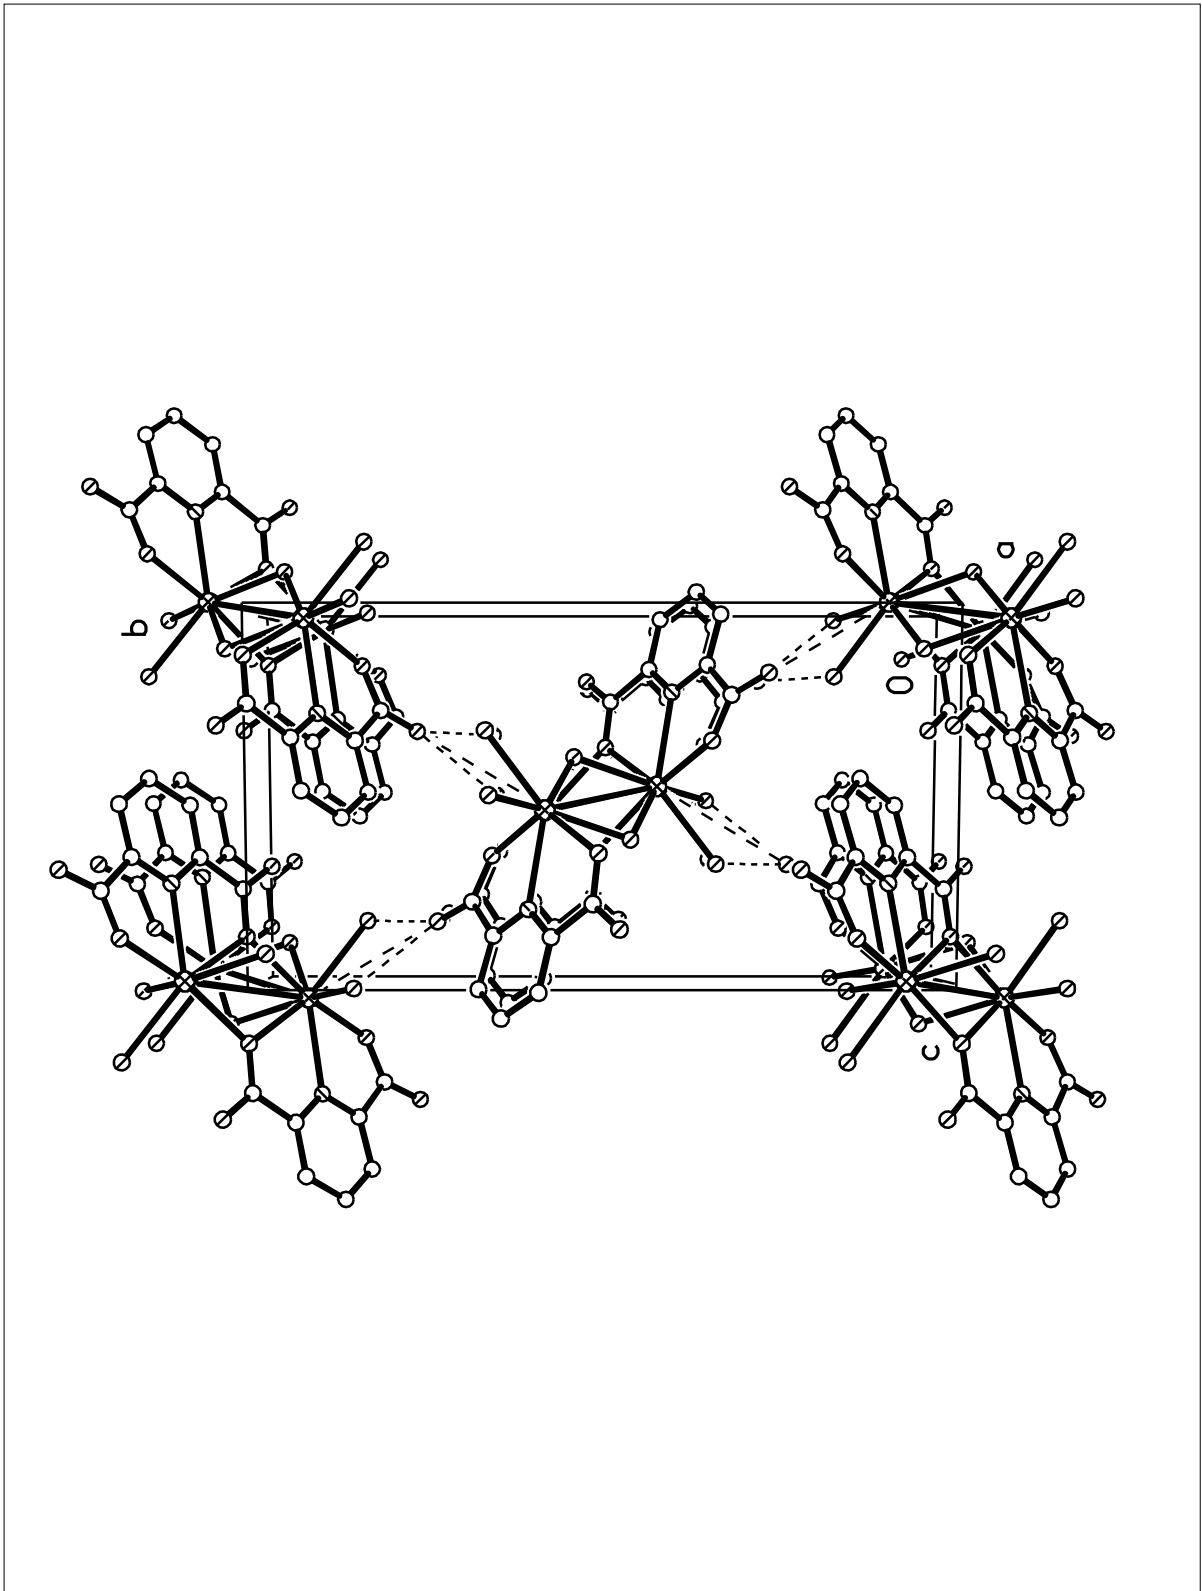

## Comment

The displacement ellipsoids were drawn at the 50% probability level (4).

## Experimental

A colorless needle-shaped crystal of dimensions 0.350 x 0.080 x 0.060 mm was selected for structural analysis. Intensity data for this compound were collected using a diffractometer with a Bruker APEX ccd area detector (1) and graphite-monochromated Mo K $\alpha$  radiation ( $\lambda = 0.71073 \text{ \AA}$ ). The sample was cooled to 100(2) K. Cell parameters were determined from a non-linear least squares fit of 5599 peaks in the range  $2.27 < \theta < 26.06^\circ$ . A total of 9838 data were measured in the range  $2.270 < \theta < 26.139^\circ$  using  $\phi$  and  $\omega$  oscillation frames. The data were corrected for absorption by the empirical method (2) giving minimum and maximum transmission factors of 0.808 and 0.963. The data were merged to form a set of 1907 independent data with  $R(\text{int}) = 0.0334$  and a coverage of 98.9 %.

The monoclinic space group  $P2_1/n$  was determined by systematic absences and statistical tests and verified by subsequent refinement. The structure was solved by direct methods and refined by full-matrix least-squares methods on  $F^2$  (3). The positions of hydrogens bonded to carbons were initially determined by geometry and were refined using a riding model. Hydrogens and deuteriums bonded to oxygens were located on a difference map, and their positions were refined independently. Non-hydrogen atoms were refined with anisotropic displacement parameters. Hydrogen atom displacement parameters were set to 1.2 times the isotropic equivalent displacement parameters of the bonded atoms. A total of 163 parameters were refined against 1907 data to give  $wR(F^2) = 0.0862$  and  $S = 1.003$  for weights of  $w = 1/[\sigma^2(F^2) + (0.0520 P)^2 + 0.8000 P]$ , where  $P = [F_o^2 + 2F_c^2] / 3$ . The final  $R(F)$  was 0.0317 for the 1746 observed,  $[F > 4\sigma(F)]$ , data. The largest shift/s.u. was 0.001 in the final refinement cycle. The final difference map had maxima and minima of 0.385 and -0.271 e/ $\text{\AA}^3$ , respectively.

## **Acknowledgment**

The authors thank the National Science Foundation (grant CHE-0130835) and the University of Oklahoma for funds to purchase of the X-ray instrument and computers. This structure was determined by Douglas R. Powell.

## **References**

- (1) (a) Data Collection: Bruker (2007). SMART Bruker AXS Inc., Madison, Wisconsin, USA. (b) Data Reduction: Bruker (2007). SAINT. Bruker AXS Inc., Madison, Wisconsin, USA.
- (2) Bruker (2002). SADABS. Bruker AXS Inc., Madison, Wisconsin, USA.
- (3) G. M. Sheldrick (2013). SHELXL University of Gottingen.

Table 1. Crystal data and structure refinement for 12136m.

|                                             |                                                                  |                           |
|---------------------------------------------|------------------------------------------------------------------|---------------------------|
| Empirical formula                           | C <sub>7</sub> H <sub>3</sub> Ca D <sub>6</sub> N O <sub>7</sub> |                           |
| Formula weight                              | 265.27                                                           |                           |
| Crystal system                              | monoclinic                                                       |                           |
| Space group                                 | <i>P</i> 2 <sub>1</sub> / <i>n</i>                               |                           |
| Unit cell dimensions                        | <i>a</i> = 5.8532(13) Å                                          | $\alpha = 90^\circ$       |
|                                             | <i>b</i> = 17.942(4) Å                                           | $\beta = 97.974(2)^\circ$ |
|                                             | <i>c</i> = 9.813(2) Å                                            | $\gamma = 90^\circ$       |
| Volume                                      | 1020.6(4) Å <sup>3</sup>                                         |                           |
| Z, Z'                                       | 4, 1                                                             |                           |
| Density (calculated)                        | 1.726 Mg/m <sup>3</sup>                                          |                           |
| Wavelength                                  | 0.71073 Å                                                        |                           |
| Temperature                                 | 100(2) K                                                         |                           |
| <i>F</i> (000)                              | 536                                                              |                           |
| Absorption coefficient                      | 0.636 mm <sup>-1</sup>                                           |                           |
| Absorption correction                       | semi-empirical from equivalents                                  |                           |
| Max. and min. transmission                  | 0.963 and 0.808                                                  |                           |
| Theta range for data collection             | 2.270 to 26.139°                                                 |                           |
| Reflections collected                       | 9838                                                             |                           |
| Independent reflections                     | 1907 [R(int) = 0.0334]                                           |                           |
| Data / restraints / parameters              | 1907 / 0 / 163                                                   |                           |
| <i>wR</i> ( <i>F</i> <sup>2</sup> all data) | <i>wR</i> 2 = 0.0862                                             |                           |
| <i>R</i> ( <i>F</i> obsd data)              | <i>R</i> 1 = 0.0317                                              |                           |
| Goodness-of-fit on <i>F</i> <sup>2</sup>    | 1.003                                                            |                           |
| Observed data [ <i>I</i> > 2σ( <i>I</i> )]  | 1746                                                             |                           |
| Largest and mean shift / s.u.               | 0.001 and 0.000                                                  |                           |
| Largest diff. peak and hole                 | 0.385 and -0.271 e/Å <sup>3</sup>                                |                           |

-----

$$wR2 = \{ \sum [w(F_o^2 - F_c^2)^2] / \sum [w(F_o^2)^2] \}^{1/2}$$

$$R1 = \sum ||F_o| - |F_c|| / \sum |F_o|$$

Table 2. Atomic coordinates and equivalent isotropic displacement parameters for 12136m. U(eq) is defined as one third of the trace of the orthogonalized  $U_{ij}$  tensor.

|        | x          | y           | z           | U(eq)       |
|--------|------------|-------------|-------------|-------------|
| Ca(1)  | 0.73169(6) | 0.42166(2)  | 0.46942(4)  | 0.00911(14) |
| O(1)   | 0.3819(2)  | 0.49524(7)  | 0.36354(13) | 0.0114(3)   |
| O(2)   | 0.1202(2)  | 0.52307(7)  | 0.18163(14) | 0.0155(3)   |
| O(3)   | 0.9836(2)  | 0.34589(7)  | 0.35130(13) | 0.0130(3)   |
| O(4)   | 1.0299(2)  | 0.26821(7)  | 0.17853(14) | 0.0165(3)   |
| O(5)   | 0.8598(2)  | 0.33845(8)  | 0.67262(15) | 0.0155(3)   |
| D(5OA) | 0.789(4)   | 0.3006(14)  | 0.691(2)    | 0.019       |
| D(5OB) | 0.852(4)   | 0.3668(13)  | 0.742(3)    | 0.019       |
| O(6)   | 0.8763(2)  | 0.53934(7)  | 0.39374(15) | 0.0118(3)   |
| D(6OA) | 0.789(4)   | 0.5745(13)  | 0.398(2)    | 0.014       |
| D(6OB) | 0.921(4)   | 0.5358(12)  | 0.321(3)    | 0.014       |
| O(7)   | 0.4019(2)  | 0.34810(7)  | 0.50721(15) | 0.0139(3)   |
| D(7OA) | 0.429(4)   | 0.3110(13)  | 0.551(2)    | 0.017       |
| D(7OB) | 0.278(4)   | 0.3424(12)  | 0.454(2)    | 0.017       |
| N(1)   | 0.5952(2)  | 0.39966(8)  | 0.21967(16) | 0.0107(3)   |
| C(1)   | 0.4040(3)  | 0.43158(10) | 0.15478(19) | 0.0119(4)   |
| C(2)   | 0.3135(3)  | 0.41507(10) | 0.0192(2)   | 0.0153(4)   |
| C(3)   | 0.4289(3)  | 0.36317(11) | -0.0505(2)  | 0.0178(4)   |
| C(4)   | 0.6296(3)  | 0.33037(10) | 0.0154(2)   | 0.0156(4)   |
| C(5)   | 0.7073(3)  | 0.35027(9)  | 0.15040(19) | 0.0119(4)   |
| C(6)   | 0.2917(3)  | 0.48766(10) | 0.23953(19) | 0.0109(4)   |
| C(7)   | 0.9250(3)  | 0.31841(10) | 0.23278(19) | 0.0115(4)   |



Table 3. Bond lengths [Å] and angles [°] for 12136m.

|                     |            |                       |            |
|---------------------|------------|-----------------------|------------|
| Ca(1)-O(1)#1        | 2.3780(13) | O(6)-Ca(1)#2          | 2.5890(14) |
| Ca(1)-O(7)          | 2.4091(14) | O(6)-D(6OA)           | 0.82(2)    |
| Ca(1)-O(3)          | 2.4166(13) | O(6)-D(6OB)           | 0.80(2)    |
| Ca(1)-O(6)          | 2.4291(14) | O(7)-D(7OA)           | 0.80(2)    |
| Ca(1)-N(1)          | 2.5014(16) | O(7)-D(7OB)           | 0.84(3)    |
| Ca(1)-O(5)          | 2.5204(14) | N(1)-C(1)             | 1.337(2)   |
| Ca(1)-O(1)          | 2.5344(13) | N(1)-C(5)             | 1.342(2)   |
| Ca(1)-O(6)#2        | 2.5890(14) | C(1)-C(2)             | 1.394(3)   |
| Ca(1)-Ca(1)#1       | 4.0090(9)  | C(1)-C(6)             | 1.513(3)   |
| Ca(1)-Ca(1)#2       | 4.1960(9)  | C(2)-C(3)             | 1.386(3)   |
| O(1)-C(6)           | 1.265(2)   | C(2)-H(2)             | 0.9500     |
| O(1)-Ca(1)#1        | 2.3780(13) | C(3)-C(4)             | 1.391(3)   |
| O(2)-C(6)           | 1.255(2)   | C(3)-H(3)             | 0.9500     |
| O(3)-C(7)           | 1.266(2)   | C(4)-C(5)             | 1.386(3)   |
| O(4)-C(7)           | 1.250(2)   | C(4)-H(4)             | 0.9500     |
| O(5)-D(5OA)         | 0.83(3)    | C(5)-C(7)             | 1.523(2)   |
| O(5)-D(5OB)         | 0.85(3)    |                       |            |
| O(1)#1-Ca(1)-O(7)   | 86.03(5)   | O(6)-Ca(1)-O(6)#2     | 66.56(5)   |
| O(1)#1-Ca(1)-O(3)   | 158.58(5)  | N(1)-Ca(1)-O(6)#2     | 133.66(5)  |
| O(7)-Ca(1)-O(3)     | 108.72(5)  | O(5)-Ca(1)-O(6)#2     | 66.72(4)   |
| O(1)#1-Ca(1)-O(6)   | 78.95(5)   | O(1)-Ca(1)-O(6)#2     | 132.78(4)  |
| O(7)-Ca(1)-O(6)     | 147.55(5)  | O(1)#1-Ca(1)-Ca(1)#1  | 36.62(3)   |
| O(3)-Ca(1)-O(6)     | 94.62(5)   | O(7)-Ca(1)-Ca(1)#1    | 77.76(4)   |
| O(1)#1-Ca(1)-N(1)   | 133.83(5)  | O(3)-Ca(1)-Ca(1)#1    | 159.52(4)  |
| O(7)-Ca(1)-N(1)     | 84.87(5)   | O(6)-Ca(1)-Ca(1)#1    | 73.02(4)   |
| O(3)-Ca(1)-N(1)     | 64.82(5)   | N(1)-Ca(1)-Ca(1)#1    | 97.27(4)   |
| O(6)-Ca(1)-N(1)     | 85.13(5)   | O(5)-Ca(1)-Ca(1)#1    | 115.47(4)  |
| O(1)#1-Ca(1)-O(5)   | 84.66(5)   | O(1)-Ca(1)-Ca(1)#1    | 34.03(3)   |
| O(7)-Ca(1)-O(5)     | 73.17(5)   | O(6)#2-Ca(1)-Ca(1)#1  | 107.58(4)  |
| O(3)-Ca(1)-O(5)     | 84.95(5)   | O(1)#1-Ca(1)-Ca(1)#2  | 75.92(3)   |
| O(6)-Ca(1)-O(5)     | 132.74(5)  | O(7)-Ca(1)-Ca(1)#2    | 160.89(4)  |
| N(1)-Ca(1)-O(5)     | 134.53(5)  | O(3)-Ca(1)-Ca(1)#2    | 87.19(4)   |
| O(1)#1-Ca(1)-O(1)   | 70.65(5)   | O(6)-Ca(1)-Ca(1)#2    | 34.48(3)   |
| O(7)-Ca(1)-O(1)     | 74.31(5)   | N(1)-Ca(1)-Ca(1)#2    | 112.14(4)  |
| O(3)-Ca(1)-O(1)     | 127.47(5)  | O(5)-Ca(1)-Ca(1)#2    | 98.57(4)   |
| O(6)-Ca(1)-O(1)     | 73.61(4)   | O(1)-Ca(1)-Ca(1)#2    | 104.81(3)  |
| N(1)-Ca(1)-O(1)     | 63.29(4)   | O(6)#2-Ca(1)-Ca(1)#2  | 32.08(3)   |
| O(5)-Ca(1)-O(1)     | 140.14(5)  | Ca(1)#1-Ca(1)-Ca(1)#2 | 90.99(2)   |
| O(1)#1-Ca(1)-O(6)#2 | 77.61(5)   | C(6)-O(1)-Ca(1)#1     | 127.67(11) |
| O(7)-Ca(1)-O(6)#2   | 137.70(5)  | C(6)-O(1)-Ca(1)       | 122.97(11) |
| O(3)-Ca(1)-O(6)#2   | 81.08(5)   | Ca(1)#1-O(1)-Ca(1)    | 109.35(5)  |

|                     |            |                |            |
|---------------------|------------|----------------|------------|
| C(7)-O(3)-Ca(1)     | 123.66(11) | C(3)-C(2)-C(1) | 117.85(17) |
| Ca(1)-O(5)-D(5OA)   | 123.9(16)  | C(3)-C(2)-H(2) | 121.1      |
| Ca(1)-O(5)-D(5OB)   | 103.4(16)  | C(1)-C(2)-H(2) | 121.1      |
| D(5OA)-O(5)-D(5OB)  | 103(2)     | C(2)-C(3)-C(4) | 119.54(18) |
| Ca(1)-O(6)-Ca(1)#2  | 113.44(5)  | C(2)-C(3)-H(3) | 120.2      |
| Ca(1)-O(6)-D(6OA)   | 114.3(15)  | C(4)-C(3)-H(3) | 120.2      |
| Ca(1)#2-O(6)-D(6OA) | 106.4(16)  | C(5)-C(4)-C(3) | 118.65(17) |
| Ca(1)-O(6)-D(6OB)   | 112.2(16)  | C(5)-C(4)-H(4) | 120.7      |
| Ca(1)#2-O(6)-D(6OB) | 96.2(17)   | C(3)-C(4)-H(4) | 120.7      |
| D(6OA)-O(6)-D(6OB)  | 113(2)     | N(1)-C(5)-C(4) | 122.37(17) |
| Ca(1)-O(7)-D(7OA)   | 116.0(16)  | N(1)-C(5)-C(7) | 114.26(16) |
| Ca(1)-O(7)-D(7OB)   | 127.5(16)  | C(4)-C(5)-C(7) | 123.37(16) |
| D(7OA)-O(7)-D(7OB)  | 109(2)     | O(2)-C(6)-O(1) | 125.59(17) |
| C(1)-N(1)-C(5)      | 118.51(16) | O(2)-C(6)-C(1) | 117.97(16) |
| C(1)-N(1)-Ca(1)     | 122.09(12) | O(1)-C(6)-C(1) | 116.43(15) |
| C(5)-N(1)-Ca(1)     | 119.23(11) | O(4)-C(7)-O(3) | 125.85(16) |
| N(1)-C(1)-C(2)      | 123.07(17) | O(4)-C(7)-C(5) | 117.94(16) |
| N(1)-C(1)-C(6)      | 114.96(16) | O(3)-C(7)-C(5) | 116.21(15) |
| C(2)-C(1)-C(6)      | 121.98(16) |                |            |

---

Symmetry transformations used to generate equivalent atoms:

#1 -x+1,-y+1,-z+1    #2 -x+2,-y+1,-z+1

Table 4. Anisotropic displacement parameters ( $\text{\AA}^2 \times 10^3$ ) for 12136m. The anisotropic displacement factor exponent takes the form:

$$-2 \pi^2 [ h^2 a^{*2} U_{11} + \dots + 2 h k a^* b^* U_{12} ]$$

|       | $U_{11}$ | $U_{22}$ | $U_{33}$ | $U_{23}$ | $U_{13}$ | $U_{12}$ |
|-------|----------|----------|----------|----------|----------|----------|
| Ca(1) | 7(1)     | 11(1)    | 8(1)     | 0(1)     | 0(1)     | 0(1)     |
| O(1)  | 10(1)    | 15(1)    | 9(1)     | -1(1)    | 0(1)     | 1(1)     |
| O(2)  | 12(1)    | 22(1)    | 12(1)    | -1(1)    | -2(1)    | 7(1)     |
| O(3)  | 10(1)    | 17(1)    | 11(1)    | -2(1)    | -2(1)    | 3(1)     |
| O(4)  | 13(1)    | 18(1)    | 18(1)    | -6(1)    | -2(1)    | 5(1)     |
| O(5)  | 15(1)    | 15(1)    | 16(1)    | 2(1)     | 0(1)     | -4(1)    |
| O(6)  | 11(1)    | 14(1)    | 11(1)    | 1(1)     | 3(1)     | 1(1)     |
| O(7)  | 11(1)    | 14(1)    | 16(1)    | 4(1)     | -3(1)    | -1(1)    |
| N(1)  | 10(1)    | 12(1)    | 10(1)    | 1(1)     | 2(1)     | -1(1)    |
| C(1)  | 10(1)    | 15(1)    | 10(1)    | 2(1)     | -1(1)    | 1(1)     |
| C(2)  | 13(1)    | 20(1)    | 12(1)    | 0(1)     | -2(1)    | 4(1)     |
| C(3)  | 20(1)    | 22(1)    | 10(1)    | -3(1)    | -4(1)    | 4(1)     |
| C(4)  | 18(1)    | 17(1)    | 12(1)    | -2(1)    | 1(1)     | 5(1)     |
| C(5)  | 11(1)    | 12(1)    | 13(1)    | 0(1)     | 1(1)     | 0(1)     |
| C(6)  | 10(1)    | 14(1)    | 9(1)     | 0(1)     | 1(1)     | -1(1)    |
| C(7)  | 10(1)    | 12(1)    | 12(1)    | 0(1)     | 2(1)     | -1(1)    |

Table 5. Hydrogen and deuterium coordinates and isotropic displacement parameters for 12136m.

|        | x        | y          | z        | U(eq) |
|--------|----------|------------|----------|-------|
| D(5OA) | 0.789(4) | 0.3006(14) | 0.691(2) | 0.019 |
| D(5OB) | 0.852(4) | 0.3668(13) | 0.742(3) | 0.019 |
| D(6OA) | 0.789(4) | 0.5745(13) | 0.398(2) | 0.014 |
| D(6OB) | 0.921(4) | 0.5358(12) | 0.321(3) | 0.014 |
| D(7OA) | 0.429(4) | 0.3110(13) | 0.551(2) | 0.017 |
| D(7OB) | 0.278(4) | 0.3424(12) | 0.454(2) | 0.017 |
| H(2)   | 0.1770   | 0.4386     | -0.0240  | 0.018 |
| H(3)   | 0.3714   | 0.3501     | -0.1427  | 0.021 |
| H(4)   | 0.7118   | 0.2950     | -0.0311  | 0.019 |

Table 6. Torsion angles [°] for 12136m.

---

|                        |             |
|------------------------|-------------|
| C(5)-N(1)-C(1)-C(2)    | 1.1(3)      |
| Ca(1)-N(1)-C(1)-C(2)   | -174.12(14) |
| C(5)-N(1)-C(1)-C(6)    | -178.77(15) |
| Ca(1)-N(1)-C(1)-C(6)   | 6.0(2)      |
| N(1)-C(1)-C(2)-C(3)    | -0.1(3)     |
| C(6)-C(1)-C(2)-C(3)    | 179.69(17)  |
| C(1)-C(2)-C(3)-C(4)    | -0.7(3)     |
| C(2)-C(3)-C(4)-C(5)    | 0.6(3)      |
| C(1)-N(1)-C(5)-C(4)    | -1.2(3)     |
| Ca(1)-N(1)-C(5)-C(4)   | 174.15(14)  |
| C(1)-N(1)-C(5)-C(7)    | 178.88(15)  |
| Ca(1)-N(1)-C(5)-C(7)   | -5.80(19)   |
| C(3)-C(4)-C(5)-N(1)    | 0.4(3)      |
| C(3)-C(4)-C(5)-C(7)    | -179.70(17) |
| Ca(1)#1-O(1)-C(6)-O(2) | -0.8(3)     |
| Ca(1)-O(1)-C(6)-O(2)   | -179.29(13) |
| Ca(1)#1-O(1)-C(6)-C(1) | 178.40(10)  |
| Ca(1)-O(1)-C(6)-C(1)   | -0.1(2)     |
| N(1)-C(1)-C(6)-O(2)    | 175.46(16)  |
| C(2)-C(1)-C(6)-O(2)    | -4.4(3)     |
| N(1)-C(1)-C(6)-O(1)    | -3.8(2)     |
| C(2)-C(1)-C(6)-O(1)    | 176.36(17)  |
| Ca(1)-O(3)-C(7)-O(4)   | -165.59(14) |
| Ca(1)-O(3)-C(7)-C(5)   | 14.6(2)     |
| N(1)-C(5)-C(7)-O(4)    | 175.07(16)  |
| C(4)-C(5)-C(7)-O(4)    | -4.9(3)     |
| N(1)-C(5)-C(7)-O(3)    | -5.1(2)     |
| C(4)-C(5)-C(7)-O(3)    | 174.95(17)  |

---

Symmetry transformations used to generate equivalent atoms:

#1 -x+1, -y+1, -z+1

Table 7. Hydrogen bonds for 12136m[Å and °].

| D-H...A              | d(D-H)  | d(H...A) | d(D...A)   | <(DHA) |
|----------------------|---------|----------|------------|--------|
| O(5)-D(5OA)...O(4)#3 | 0.83(3) | 1.95(3)  | 2.7250(19) | 156(2) |
| O(5)-D(5OB)...O(2)#1 | 0.85(3) | 2.11(3)  | 2.861(2)   | 146(2) |
| O(6)-D(6OA)...O(7)#1 | 0.82(2) | 2.08(2)  | 2.849(2)   | 156(2) |
| O(6)-D(6OB)...O(2)#4 | 0.80(2) | 1.93(2)  | 2.698(2)   | 162(2) |
| O(7)-D(7OA)...O(4)#3 | 0.80(2) | 1.93(3)  | 2.719(2)   | 170(2) |
| O(7)-D(7OB)...O(3)#5 | 0.84(3) | 1.87(3)  | 2.7014(18) | 169(2) |

Symmetry transformations used to generate equivalent atoms:

#1 -x+1, -y+1, -z+1    #3 x-1/2, -y+1/2, z+1/2    #4 x+1, y, z    #5 x-1, y, z
